# Supplementary material for: Fabrication of a micro-nano structure on steel surface and surface wetting
Source: Royal Society of Chemistry journal article supplement (doi:10.1039/c6ra03734h), 2016-01-01
Supplement: c6ra03734h1.pdf [file c6ra03734h1.pdf]

**Fabrication of a micro-nano structure on steel surface and surface wetting**

Song Luo, Qiongbin Zheng, Xiaohua Jie\* and Liuyan Zhang,

*School of Materials and Energy, Guangdong University of Technology, Guangzhou*

*510006, PR China*

**Supplementary Information**

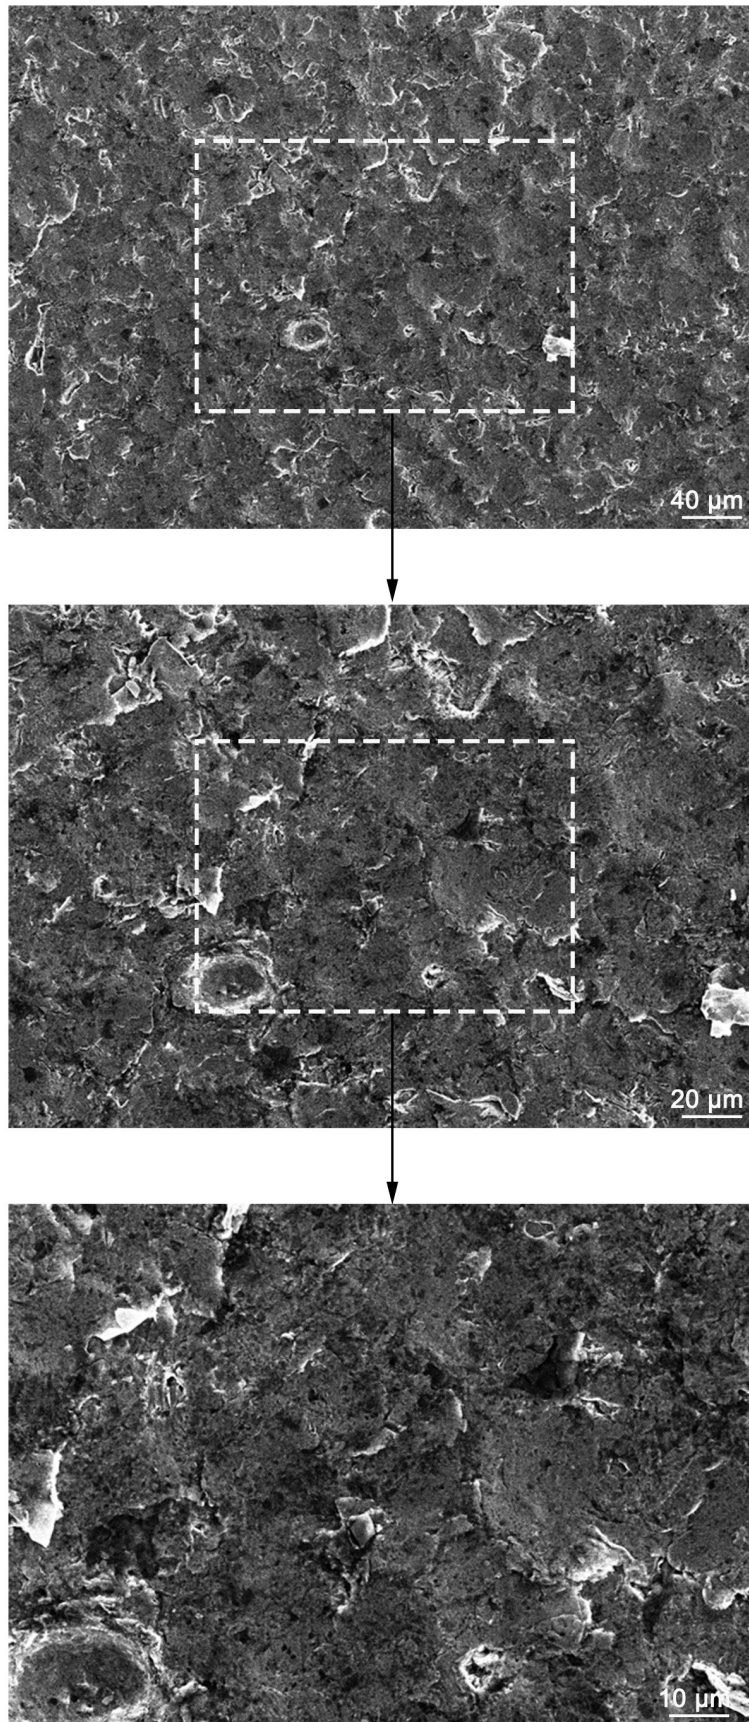

Fig. S1 SEM images of the concave-convex surface texture of the MSP-sample (peening pressure, 0.2 MPa).

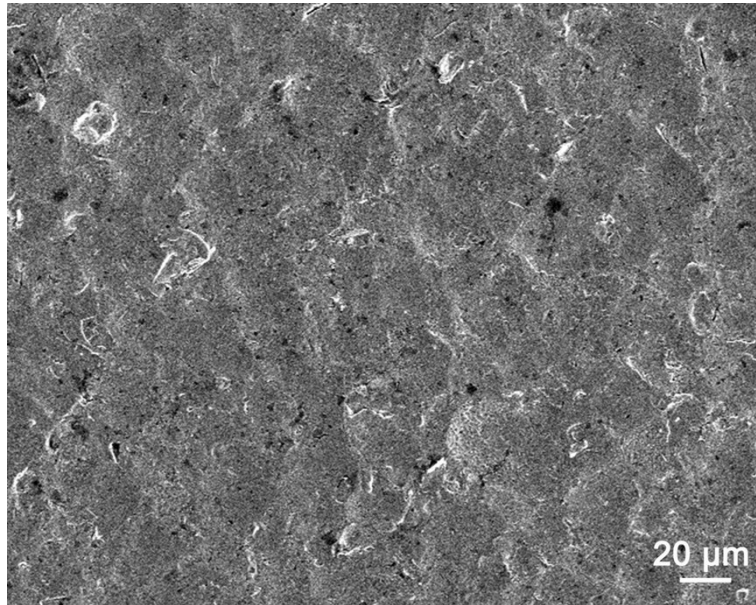

Fig. S2 SEM image of the concave-convex surface texture of the MSP-sample (peening pressure, 0.1 MPa).
